# Supplementary material
Source: PubMed Central journal article supplement (PMC2825747)
Supplement: NIHMS173160-supplement-1_si_001.pdf [file NIHMS173160-supplement-1_si_001.pdf]

## SUPPORTING INFORMATION

### **Single Agents with Designed Combination Chemotherapy Potential: Synthesis and Evaluation of Substituted Pyrimido[4,5-*b*]indoles as Receptor Tyrosine Kinase and Thymidylate Synthase Inhibitors and as Antitumor Agents**

Aleem Gangjee,<sup>\*†</sup> Nilesh Zaware,<sup>†</sup> Sudhir Raghavan,<sup>†</sup> Michael Ihnat,<sup>Ω</sup> Satyendra Shenoy,<sup>Ω</sup>

Roy L. Kisliuk<sup>£</sup>

#### **Elemental Analysis**

#### **High-Resolution Mass Spectra (HRMS) (EI)**

### Elemental Analysis

| Compd     | Formula                                                                | Calcd, % |      |       |       | Found, % |      |       |       |
|-----------|------------------------------------------------------------------------|----------|------|-------|-------|----------|------|-------|-------|
|           |                                                                        | C        | H    | N     | Cl/S  | C        | H    | N     | Cl/S  |
| <b>1</b>  | C <sub>16</sub> H <sub>13</sub> N <sub>5</sub> S                       | 62.52    | 4.26 | 22.78 | 10.43 | 62.51    | 4.51 | 22.44 | 10.35 |
| <b>2</b>  | C <sub>17</sub> H <sub>15</sub> N <sub>5</sub> S. 0.4 H <sub>2</sub> O | 62.14    | 4.85 | 21.31 | 9.76  | 62.39    | 4.56 | 21.00 | 9.56  |
| <b>6</b>  | C <sub>11</sub> H <sub>11</sub> ClN <sub>2</sub> O <sub>2</sub>        | 55.35    | 4.64 | 11.73 | 14.85 | 55.18    | 4.61 | 11.74 | 14.99 |
| <b>10</b> | C <sub>10</sub> H <sub>8</sub> ClN <sub>5</sub>                        | 51.40    | 3.45 | 29.97 | 15.17 | 51.58    | 3.46 | 29.86 | 15.05 |

### High-resolution mass spectra (HRMS) (ESI)

| Compd    | Formula                                                            | Calcd. mass | Found mass |
|----------|--------------------------------------------------------------------|-------------|------------|
| <b>7</b> | C <sub>10</sub> H <sub>7</sub> ClN <sub>4</sub> O                  | 234.0309    | 234.0308   |
| <b>8</b> | C <sub>15</sub> H <sub>15</sub> ClN <sub>4</sub> O <sub>2</sub> Na | 341.0757    | 341.0781   |
| <b>9</b> | C <sub>15</sub> H <sub>14</sub> Cl <sub>2</sub> N <sub>4</sub> ONa | 359.0428    | 359.0442   |
